# Supplementary material
Source: MDPI journal article supplement (https://www.mdpi.com/1424-2818/14/7/568)
Supplement: s1 [file s1]

## Prey selectivity in juvenile red king crabs from the coastal Barents Sea

Lyudmila V. Pavlova and Alexander G. Dvoretsky \*

Murmansk Marine Biological Institute of the Russian Academy of Sciences (MMBI RAS),  
183010 Murmansk, Russia; pavlova\_l@mmbi.info

\* Correspondence: ag-dvoretsky@yandex.ru

**Table S1.** Percent composition of biomass (M, %) and Ivlev's electivity (E) for benthic food items of red king crabs in Kola Bay

| Food item                       | Taxonomic group | Site |       |      |       |       |      |       |       |       |      |
|---------------------------------|-----------------|------|-------|------|-------|-------|------|-------|-------|-------|------|
|                                 |                 | 1    |       | 2    |       | 3     |      | 4     |       | 5     |      |
|                                 |                 | M, % | E     | M, % | E     | M, %  | E    | M, %  | E     | M, %  | E    |
| <i>Alitta virens</i>            | Po              | –    | –     | –    | –     | –     | –    | 4.40  | -0.74 | –     | –    |
| <i>Chaetozone setosa</i>        | Po              | 0.05 | -0.79 | –    | –     | –     | –    | –     | –     | –     | –    |
| <i>Cistenides hyperborea</i>    | Po              | 0.40 | 1     | –    | –     | 7.85  | 0.51 | 12.50 | 0.57  | 16.55 | 0.97 |
| <i>Cistenides granulata</i>     | Po              | 0.30 | -0.96 | 0.28 | -0.71 | –     | –    | –     | –     | –     | –    |
| <i>Galathowenia oculata</i>     | Po              | 0.00 | -0.99 | –    | –     | –     | –    | –     | –     | –     | –    |
| Polynoidae g.sp.                | Po              | –    | –     | 0.37 | 0.28  | –     | –    | –     | –     | –     | –    |
| Polychaeta g. sp.               | Po              | 0.20 | –     | –    | –     | 1.10  | –    | 16.89 | –     | 2.33  | –    |
| Amphipoda g.sp.                 | Cr              | 5.82 | –     | –    | –     | –     | –    | –     | –     | –     | –    |
| <i>Balanus balanus</i>          | Cr              | –    | –     | –    | –     | 20.60 | 0.88 | 0.15  | 1     | –     | –    |
| <i>Balanus crenatus</i>         | Cr              | 5.70 | 1     | –    | –     | –     | –    | 5.69  | 1     | 4.37  | 1    |
| <i>Idotea baltica</i>           | Cr              | –    | –     | 0.05 | 1     | –     | –    | –     | –     | –     | –    |
| <i>Lamprops fuscatus</i>        | Cr              | 0.01 | -0.96 | –    | –     | –     | –    | –     | –     | –     | –    |
| <i>Verruca stroemia</i>         | Cr              | –    | –     | –    | –     | –     | –    | 0.31  | 1     | 3.58  | 1    |
| <i>Nimphon</i> sp.              | Py              | –    | –     | 0.01 | 1     | –     | –    | –     | –     | –     | –    |
| <i>Pseudopallene spinipes</i>   | Py              | –    | –     | 0.03 | 1     | –     | –    | –     | –     | –     | –    |
| Crustacea g. sp.                | Cr              | –    | –     | –    | –     | 9.26  | –    | –     | –     | –     | –    |
| <i>Buccinum undatum</i> juv.    | Ga              | –    | –     | –    | –     | –     | –    | –     | –     | 17.50 | 1    |
| <i>Cryptonatica affinis</i>     | Ga              | –    | –     | 0.02 | 1     | –     | –    | –     | –     | –     | –    |
| <i>Dendronotus frondosus</i>    | Ga              | 0.24 | 1     | –    | –     | –     | –    | –     | –     | –     | –    |
| <i>Lacuna vincta</i>            | Ga              | 0.31 | 1     | 0.27 | -0.37 | 0.13  | 0.52 | –     | –     | –     | –    |
| <i>Lepeta caeca</i>             | Ga              | –    | –     | 0.94 | -0.21 | –     | –    | –     | –     | –     | –    |
| <i>Littorina</i> sp.            | Ga              | –    | –     | –    | –     | –     | –    | 37.84 | 0.98  | 9.28  | 1    |
| <i>Margarites helycinus</i>     | Ga              | 0.01 | 1     | –    | –     | –     | –    | –     | –     | –     | –    |
| <i>Margarites groenlandicus</i> | Ga              | –    | –     | 1.48 | 0.11  | –     | –    | –     | –     | –     | –    |
| <i>Margaritacea</i> g. sp.      | Ga              | –    | –     | –    | –     | 0.32  | 1    | –     | –     | –     | –    |

|                                          |    |       |       |       |       |       |      |       |       |       |       |
|------------------------------------------|----|-------|-------|-------|-------|-------|------|-------|-------|-------|-------|
| <i>Neptunea despecta</i> juv.            | Ga | 2.19  | 1     | –     | –     | –     | –    | –     | –     | –     | –     |
| <i>Onoba aculeus</i>                     | Ga | 0.00  | -0.98 | –     | –     | 10.34 | 0.99 | –     | –     | –     | –     |
| <i>Onoba semicostata</i>                 | Ga | 0.09  | -0.95 | 0.02  | -0.99 | –     | –    | –     | –     | –     | –     |
| <i>Peringia ulvae</i>                    | Ga | 0.20  | 1     | –     | –     | –     | –    | –     | –     | –     | –     |
| <i>Puncturella noachina</i>              | Ga | –     | –     | 0.10  | -0.35 | –     | –    | –     | –     | –     | –     |
| <i>Rissoa parva</i>                      | Ga | –     | –     | –     | –     | 2.61  | 0.99 | –     | –     | –     | –     |
| <i>Tectura virginea</i>                  | Ga | –     | –     | 0.21  | -0.04 | –     | –    | –     | –     | –     | –     |
| <i>Testudinalia testudinalis</i>         | Ga | –     | –     | 0.05  | -0.88 | 0.28  | –    | –     | –     | –     | –     |
|                                          |    |       |       |       |       |       | 0.52 |       |       |       |       |
| Gastropoda g. sp.                        | Ga | –     | –     | 0.01  | –     | 0.31  | –    | –     | –     | 0.09  | –     |
| <i>Boreochiton ruber</i>                 | Pp | –     | –     | –     | –     | 6.30  | 0.74 | –     | –     | –     | –     |
| <i>Stenosemus albus</i>                  | Pp | –     | –     | –     | –     | 1.54  | 0.99 | –     | –     | –     | –     |
| <i>Tonicella marmorea</i>                | Pp | –     | –     | 9.7   | 0.83  | 3.30  | 0.24 | –     | –     | –     | –     |
| <i>Arctica islandica</i>                 | Bi | 19.31 | 0.94  | 5.83  | 0.45  | –     | –    | –     | –     | 0.77  | -0.96 |
| <i>Astarte borealis</i>                  | Bi | –     | –     | 0.88  | -0.95 | –     | –    | –     | –     | –     | –     |
| <i>Astarte elliptica</i>                 | Bi | 0.03  | -0.46 | –     | –     | –     | –    | –     | –     | –     | –     |
| <i>Astarte montagui</i>                  | Bi | 0.09  | 1     | 0.04  | 1     | –     | –    | –     | –     | –     | –     |
| <i>Axinopsida orbiculata</i>             | Bi | 0.32  | 1     | –     | –     | –     | –    | –     | –     | –     | –     |
| <i>Chlamis islandica</i>                 | Bi | –     | –     | 0.57  | 0.87  | –     | –    | –     | –     | –     | –     |
| <i>Crenella decussata</i>                | Bi | 2.39  | -0.72 | –     | –     | –     | –    | –     | –     | –     | –     |
| <i>Ennucula tenuis</i>                   | Bi | 20.00 | 0.84  | –     | –     | –     | –    | –     | –     | –     | –     |
| <i>Heteranomia aculeata</i>              | Bi | –     | –     | –     | –     | 3.14  | 0.27 | –     | –     | 0.77  | 1     |
| <i>Heteranomia squamula</i>              | Bi | –     | –     | 1.25  | -0.51 | 21.75 | 0.55 | 0.68  | 1     | –     | –     |
| <i>Hiatella arctica</i>                  | Bi | –     | –     | –     | –     | –     | –    | 18.83 | 1     | –     | –     |
| <i>Macoma calcarea</i>                   | Bi | 11.76 | -0.16 | –     | –     | –     | –    | –     | –     | –     | –     |
| <i>Mya truncata</i>                      | Bi | 27.62 | 0.90  | 7.22  | 0.95  | –     | –    | –     | –     | –     | –     |
| <i>Mytilus edulis</i>                    | Bi | 0.50  | 1     | 12.88 | 0.96  | 3.16  | –    | –     | –     | –     | –     |
|                                          |    |       |       |       |       |       | 0.21 | 15.67 | -0.24 | 0.78  | 0.97  |
| <i>Nuculana pernula</i>                  | Bi | 1.27  | 0.79  | –     | –     | –     | –    | –     | –     | –     | –     |
| <i>Parvicardium pinnulatum</i>           | Bi | 5.06  | -0.24 | 11.14 | 0.90  | 0.01  | 0.07 | –     | –     | 27.28 | 0.98  |
| <i>Thyasira</i> sp.                      | Bi | 0.07  | -0.81 | –     | –     | –     | –    | –     | –     | –     | –     |
| <i>Yoldiella lenticula</i>               | Bi | 0.50  | -0.04 | –     | –     | –     | –    | –     | –     | –     | –     |
| <i>Bivalvia</i> g. sp.                   | Bi | –     | –     | –     | –     | 7.70  | –    | 2.08  | 1     | 0.07  | –     |
| <i>Bryozoa</i> g. sp.                    | Br | –     | –     | 0.00  | -0.25 | –     | –    | –     | –     | –     | –     |
| <i>Asterias rubens</i>                   | Ec | –     | –     | 5.13  | 0.87  | –     | –    | 1.37  | 1     | 0.55  | 1     |
| <i>Strongylocentrotus droebachiensis</i> | Ec | 0.08  | 1     | 30.26 | 0.97  | –     | –    | 0.49  | 1     | 6.34  | 1     |
| <i>Ophiopholis aculeata</i>              | Ec | –     | –     | 0.29  | -0.43 | –     | –    | –     | –     | 9.74  | 0.99  |
| <i>Ophiura robusta</i>                   | Ec | 0.36  | 0.89  | 0.94  | 0.53  | –     | –    | –     | –     | –     | –     |
| <i>Pelonaia corrugata</i>                | As | 0.56  | 1     | –     | –     | –     | –    | –     | –     | –     | –     |
| Number of species                        |    |       | 31    |       | 28    |       | 18   |       | 13    |       | 9     |

Note: As – Ascidiacea, Bi – Bivalvia, Br – Bryozoa, Cr – Crustacea, Ec – Echinodermata, Ga – Gastropoda, Po – Polychaeta, Pp – Polyplacophora, Py – Pycnogonida.
